# Supplementary material
Source: HighWire-hosted journal article supplement (https://bmjopen.bmj.com/content/12/1/e059062)
Supplement: inline-supplementary-material-1 [file inline-supplementary-material-1.pdf]

## Supplementary materials

### A. Patient consent form

#### 知情同意书

##### 尊敬的受试者：

我们在此邀请您参加一项中国人民解放军总医院眼科医学部开展的“主动液流控制系统与重力液流控制系统行白内障超声乳化手术效果”的临床研究。本知情同意书提供给您一些信息以帮助您决定是否参加此项研究。请您用一定的时间仔细阅读下面的内容，如有不清楚的问题或术语，可以与有关医生进行讨论。您参加本项研究是完全自愿的。本研究已经得到解放军总医院医学伦理委员会的审查和批准。

##### 研究背景：

白内障是世界首位不可逆性致盲性眼病，手术是治愈白内障的唯一方式。白内障手术是眼科常见的手术之一，其中超声乳化手术是首选的手术方法。超声乳化术的出现给白内障手术带来了革命性的变化，并能够显著改善患者的术后视力。手术安全性和手术效率是白内障手术考虑的主要因素，它们受到多种因素的影响，包括外科医生的经验，使用的手术技术、手术设备以及患者个体差异等。近年来，为了提高白内障手术的效率并改善患者的预后，超声乳化手术系统、超乳手柄尖端和套筒等方面的研究不断取得新的进展。目前在临床使用的白内障超声乳化手术灌注液流系统包括重力液流控制系统和主动液流控制系统。但目前关于不同液流系统对白内障手术的围术期结果与预后结局影响的研究仍然较少。

##### 研究目的：

比较在主动液流控制系统与重力液流控制系统下行白内障超声乳化联合人工晶状体植入术的围术期结果与预后结局。

##### 研究内容：

##### 1) 研究概况

本研究拟招募年龄相关性白内障患者，随机将待手术眼分入主动灌注组与重力灌注组进行常规白内障手术，术后进行随访记录。

“随机分组”表示您会被随机地分配到一个治疗组中。您有 1/2 的机会接受在主动液流控制系统下进行的白内障手术，1/2 的机会接受在重力液流控制系统下进行的白内障手术。

“双盲”表示您和您的研究医生均不知道您接受的是哪种手术系统。在研究期间，您和您的研究医生也不会被告知您接受了哪种治疗。这样可以保证参与本试验性研究的每一个人都能够公平公正地应答主观感受，并评价手术的安全性和有效性。但在紧急情况下，您和您的医生都有权知晓相关信息。

本研究不存在“安慰剂对照”。在整个研究过程中，我们将通过一系列检查来评价您对手术的反应和您的健康状况。

##### 2) 研究程序

本研究将持续 3 个月共 4 次随访，分别为术后 1 天、1 周、1 个月和 3 个月。在此期间，您需要来医院做一些检查、按日程进行回访、填写问卷，并告诉我们您的任何变化。检查包括：裂隙灯、视力、眼压、角膜内皮镜、OCTA、视觉质量。

##### 该研究可能会带来的影响：

这些回访和检查需要您合理安排就诊时间，涉及的检查都是无创的。如果您关于研究中检查和步骤有疑问，可以随时向研究医生咨询。

**研究的风险和不良反应：**

研究过程中您可能会出现不良反应。我们会监测研究中所有患者的不良反应。如果您在随访期间出现任何不良反应，请及时给您的研究医生打电话咨询。

**已知风险：**

目前，白内障超声乳化手术是治疗白内障最常用的方法。但由于医学科学的特殊性 & 个体差异，任何手术方法均存在风险。具体如下：在手术过程中可能出现：(1) 各种感染（细菌、真菌、病毒等）；(2) 麻醉及手术意外导致球后出血、视力下降甚至丧失；(3) 眼心反射，严重心律失常；(4) 爆发性出血，动脉硬化、高龄、患有高度近视、小眼球等基础眼病的患者风险大大升高；(5) 因高龄玻璃体液化明显，患者配合度差，高度近视、网脱术后眼等等各种基础眼病，使玻璃体腔失去支撑所致的后囊膜破裂及玻璃体脱出，需行前部玻璃体切割，或晶状体核坠入玻璃体腔需行后段玻璃体切除，人工晶体需要悬吊植入甚至一期不能植入，需 1-3 个月后根据眼部恢复情况行二期人工晶体悬吊植入；(6) 硅油眼硅油溢出，需行玻璃体切割，补充硅油；(7) 术前存在角膜病变、高龄角膜结构疏松、白内障程度过重、青光眼、小眼球、小角膜、浅前房等等原因导致角膜内皮损伤，需行进一步治疗或角膜移植手术；(8) 其他难以预料的、危及患者生命或致残的意外情况。

在手术后可能出现：(1) 因术前存在眼底病或其他眼病，术后视力提高有限；(2) 因术后早期活动、受伤、剧烈咳嗽、低头等原因所致人工晶体位置偏移、脱位需二次行手术处理；(3) 术前存在角膜病变、高龄患者角膜内皮细胞数过少、白内障程度过重等原因导致角膜内皮无法承受手术损伤而出现进行性角膜失代偿，需行进一步治疗或角膜移植手术；(4) 术后早期粘弹剂代谢障碍出现高血压需行前房穿刺放液；(5) 因青光眼等基础眼病或其他原因导致术后眼压高需进一步药物治疗或手术治疗；(6) 术前屈光不正患者，尤其是高度近视患者，人工晶体度数测量存在误差，致术后屈光不正，需配镜矫正，甚至行二次人工晶体置换；(7) 正视眼患者术后老花需佩戴老花镜，近视患者术后仍保留近视需佩戴眼镜及调整近视度数；(8) 术前干眼患者术后干眼加重，老年患者术后睑板腺功能障碍导致眼磨、眼干、眼痛、眼胀、畏光、流泪等需药物治疗；(9) 黄斑水肿，尤其是术前糖尿病、高血压或患有基础眼病患者发生风险大大提高，需进一步治疗；(10) 因手术必须散瞳，而高龄、青光眼等眼部基础病导致虹膜张力差，术后出现不可逆性瞳孔散大无法恢复；(11) 术后晶体囊膜混浊，出现后发性白内障，需激光治疗；(12) 玻璃体混浊术后突显；(13) 其他可能出现的情况。

**未知风险：** 可能存在一些目前无法预知的风险及不良反应。

**手术的风险：** 见上。

**其他风险：** 无。

**研究获益：**

如果您同意参加本研究，您将获得直接的医疗受益，并享受部分项目免费检查的权益。我们希望本研究得到的信息能够对您病情相同的病人有指导意义，或有助于确定哪种治疗方法可以更安全有效地治疗与您患有相似病情的其他患者。本研究获得的相关研究信息与结果将会适时告知您。

**生物标本和医疗信息的处理和利用：**

本研究将不会采集额外的生物标本。所有患者的医疗信息将进行保密存储，仅研究人员及伦理委员会成员可见。

**您的权利和义务：**

您有充分的时间考虑和随时提问的权利，且是否要参加本研究的最终决定权在您。如果您决定不参加本研究，也不会影响您应该得到的其他医学治疗；如果您决定参加，请您如实的告诉研究医生有关自身病史和身体状况的真实情况，告诉研究医生自己是否曾参与

其他研究，或目前正参与其他研究，并请您在这份书面知情同意书上签字。签字后，您仍然可以在研究的任何阶段退出本研究。如果在研究期间发现任何新的、重要的，并且可能会影响您继续参加这一研究意愿的信息，您的研究医生或其他研究小组成员会立即通知您。您也可以随时了解和咨询研究情况。

如果您没有遵守研究计划，或者研究医生认为您继续参加本研究不符合您的最大利益，研究医生可以让您退出研究；如果您出现了手术后严重的并发症，或研究期间有关于研究手术系统的新的安全性的信息出现，研究医生或申办者可能会在未征得您同意的情况下终止您参与本研究。

如果您因为某些原因从研究中退出，您可能被询问有关您进行手术的情况。如果研究医生认为需要，您也可能被要求进行计划外的体格检查和实验室检查，研究医生将会和您讨论退出研究后的医疗事宜。

#### **参加研究的相关费用：**

随访时接受的裂隙灯、眼压、角膜内皮镜、OCTA、视觉质量检查是免费的，门诊的医师诊疗费、验光费用需要您自己承担。

#### **报酬或补偿：**

本研究无报酬或补偿。

#### **研究所致损害的处理措施：**

上述两种手术系统已有广泛的临床应用资料。如果您的健康确因参加这项研究而发生与研究相关的损害，请立即通知研究医生，研究医生将负责对您采取适当的治疗措施。

即使您已经签署这份知情同意书，您仍然保留您所有的合法权利。如您的权益受到侵犯，您可以联系解放军总医院医学伦理委员会，电话：010-6xxxxxx6。

#### **保密性：**

如果您决定参加本研究，您在研究中的个人资料均会保密。负责研究的医生及其他研究人员将使用您的医疗信息进行研究。您的档案仅供研究人员查阅。研究中会用编号来标识您的研究信息，您的身份不会被识别。任何有关本研究结果的公开报告均不会披露您的个人身份。我们将遵循有关法律和规定，确保您个人医疗资料的隐私得到充分保护。

#### **自愿参加：**

参加本研究是完全自愿的，您可以拒绝参加研究，或者研究过程中的任何时候选择退出研究，不需任何理由。该决定不会影响您未来的治疗。

如果您决定退出本研究，请提前通知您的研究医生。为了保障您的安全，您可能被要求进行相关检查，这对保护您的健康是有利的。

#### **研究中如何获得帮助：**

您可随时了解与本研究有关的信息资料和研究进展，如果您有与本研究有关的问题，请与中国人民解放军总医院眼科医学部的罗 X 医生联系，电话：19xxxxxxx01，地址：北京市海淀区复兴路 28 号。

---

**本人已知晓研究相关收益及风险，同意参加此项研究**

患 者：\_\_\_\_\_ 日期：\_\_\_\_\_

---

**研究相关收益及风险已与患者本人交代清楚**

研究人员：\_\_\_\_\_ 日期：\_\_\_\_\_

## B. Supplementary Table 1. Types of IOLs and their characteristics

| IOL Model           | Manufacturers                     | A constant | Characteristics               |
|---------------------|-----------------------------------|------------|-------------------------------|
| HOYA 250            | HOYA corp., Japan                 | 118.8      | preloaded                     |
| ZCB00               | Johnson & Johnson<br>Vision, US   | 119.3      | one-piece                     |
| CT Lucia 601PY      | Carl Zeiss Meditec AG,<br>Germany | 119.2      | heparin coated                |
| AR40e               | Johnson & Johnson<br>Vision, US   | 118.4      | three-piece                   |
| AcrySof IQ          | Alcon Laboratories Inc.,<br>US    | 118.7      | UV and blue light<br>filtered |
| AcrySof IQ<br>TORIC | Alcon Laboratories Inc.,<br>US    | N/A        | astigmatism<br>corrected      |
